# Supplementary material for: GM-CSF action in the CNS decreases food intake and body weight
Source: JCI journal article supplement (doi:10.1172/jci25681), 2005-11-01
Supplement: sd1 [file 1]

## SUPPLEMENTAL FIGUR E 1

**A**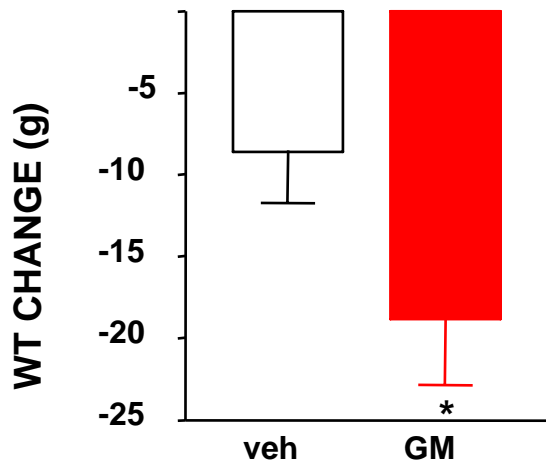**B**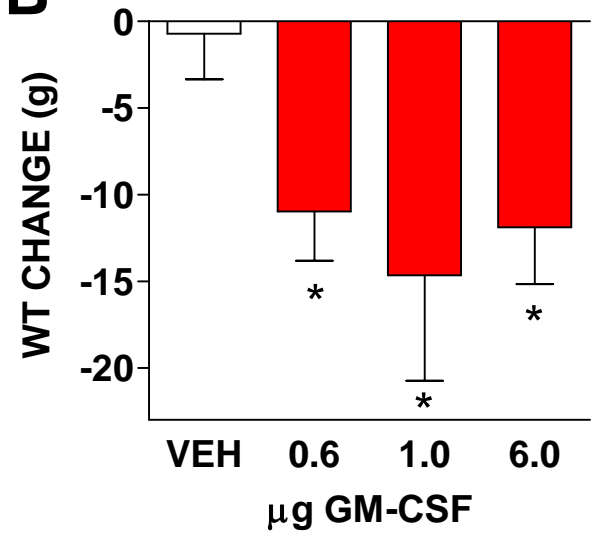**C**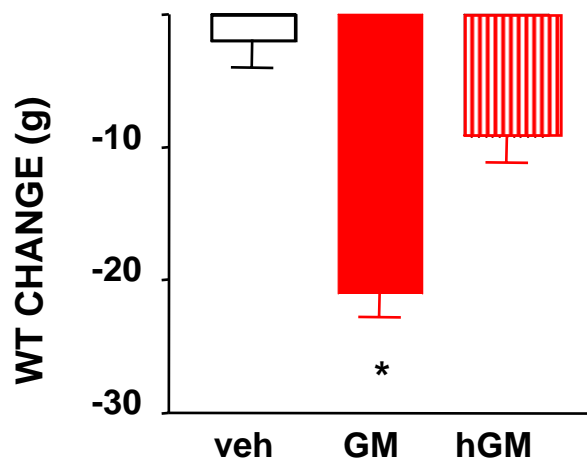

## SUPPLEMENTAL FIGURE 2

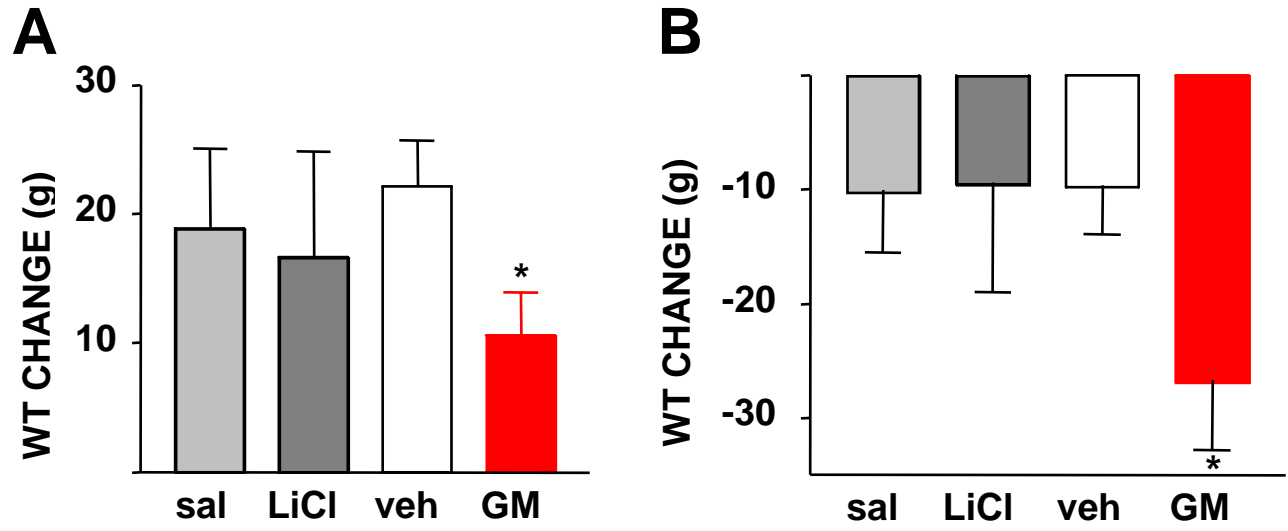

## SUPPLEMENTAL FIGURE 3

**A**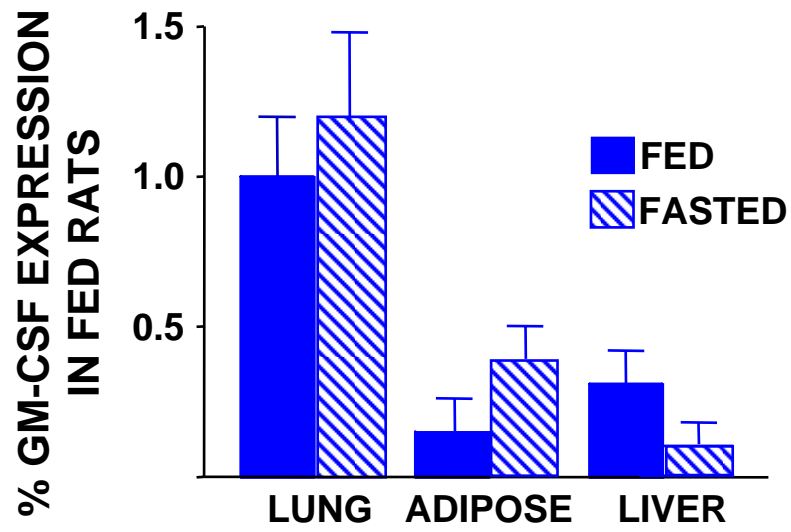**B**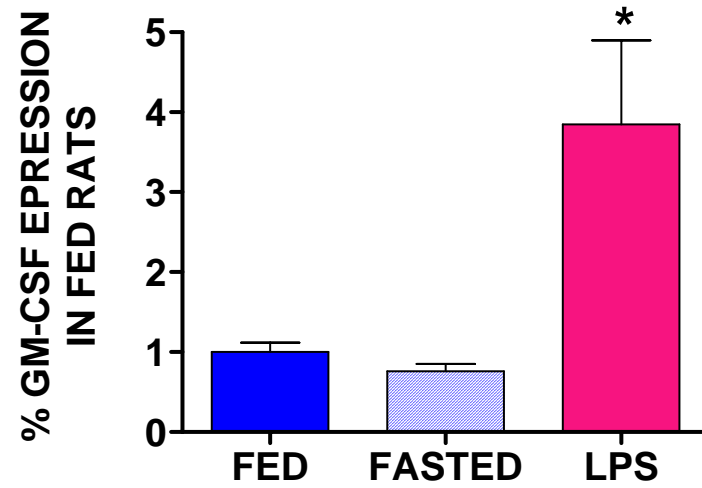

## SUPPLEMENTAL FIGURE 4

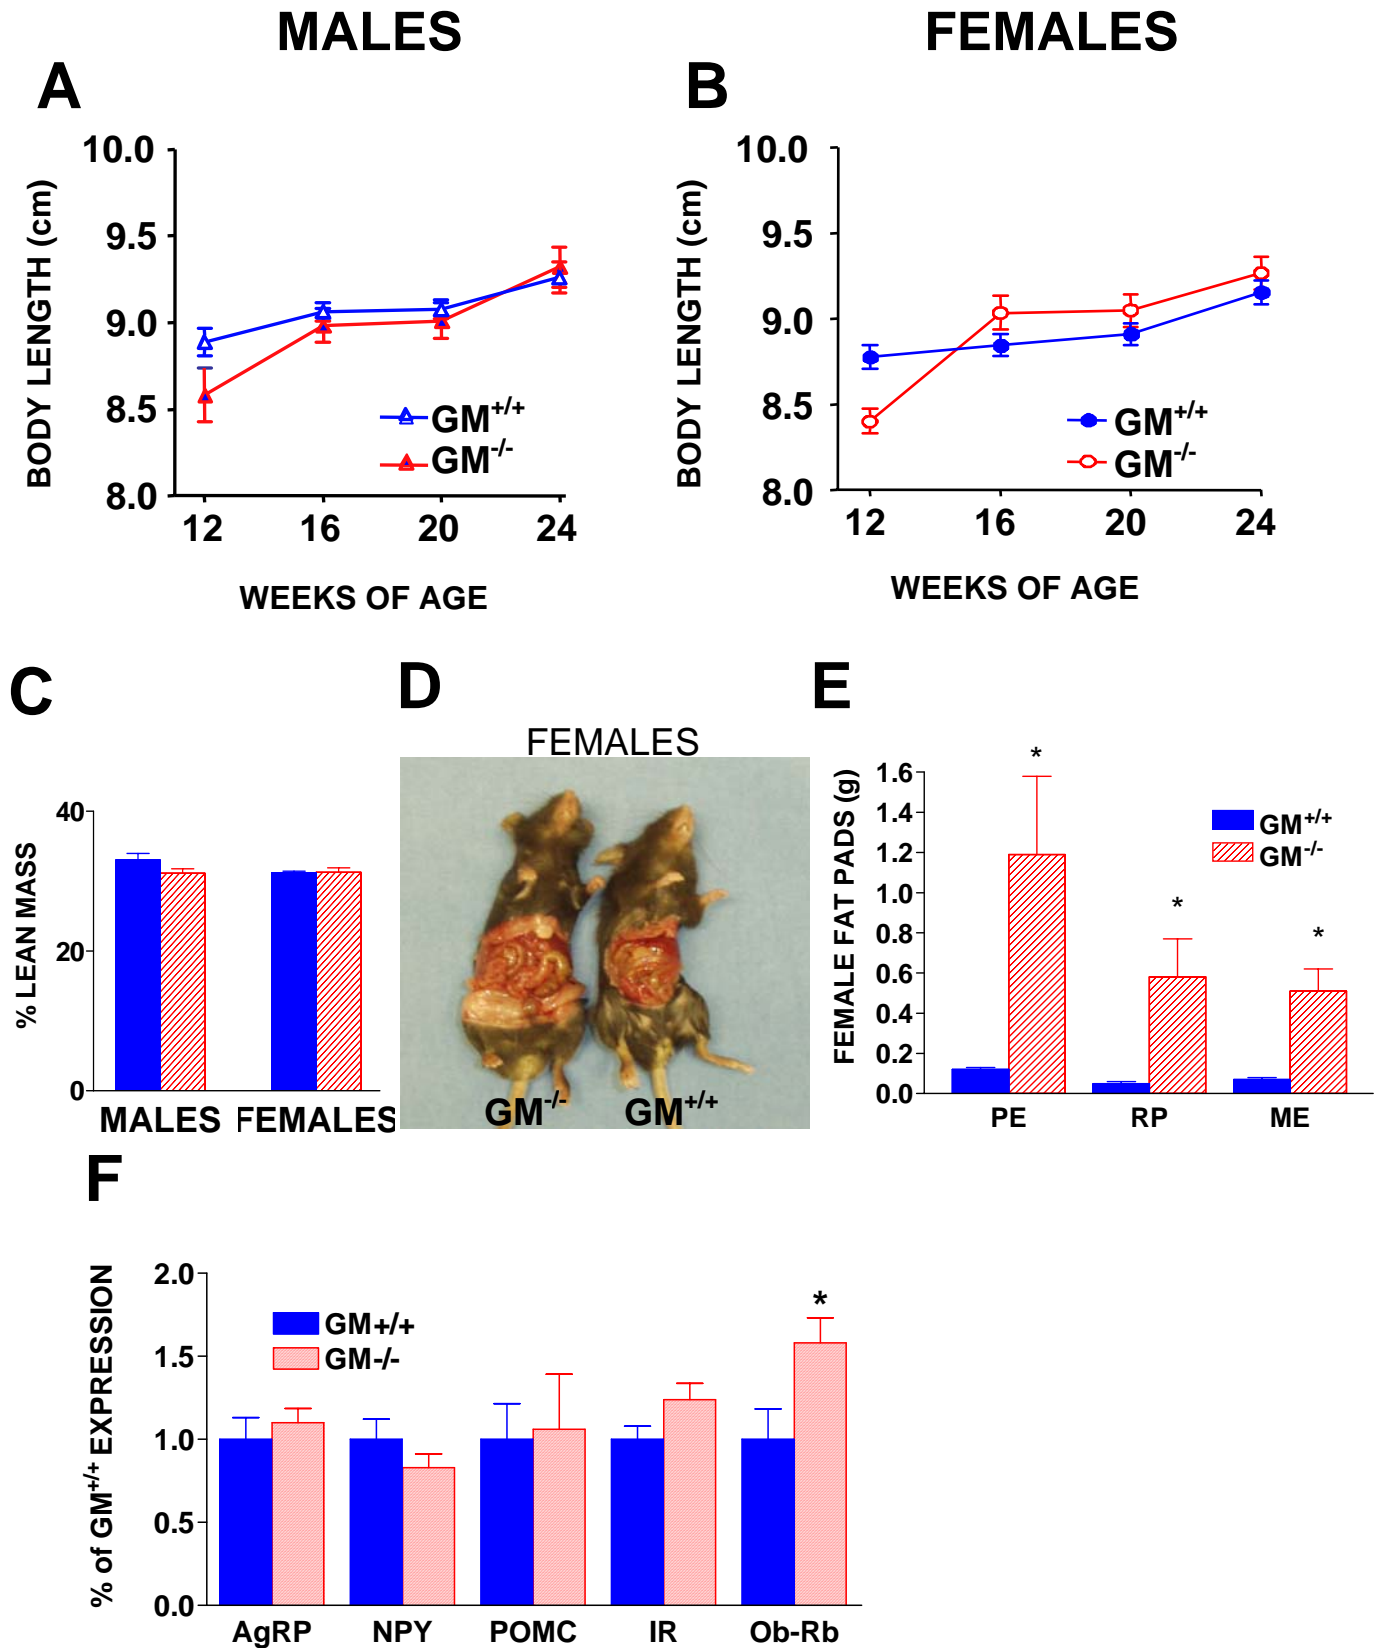

## SUPPLEMENTAL FIGURE 5

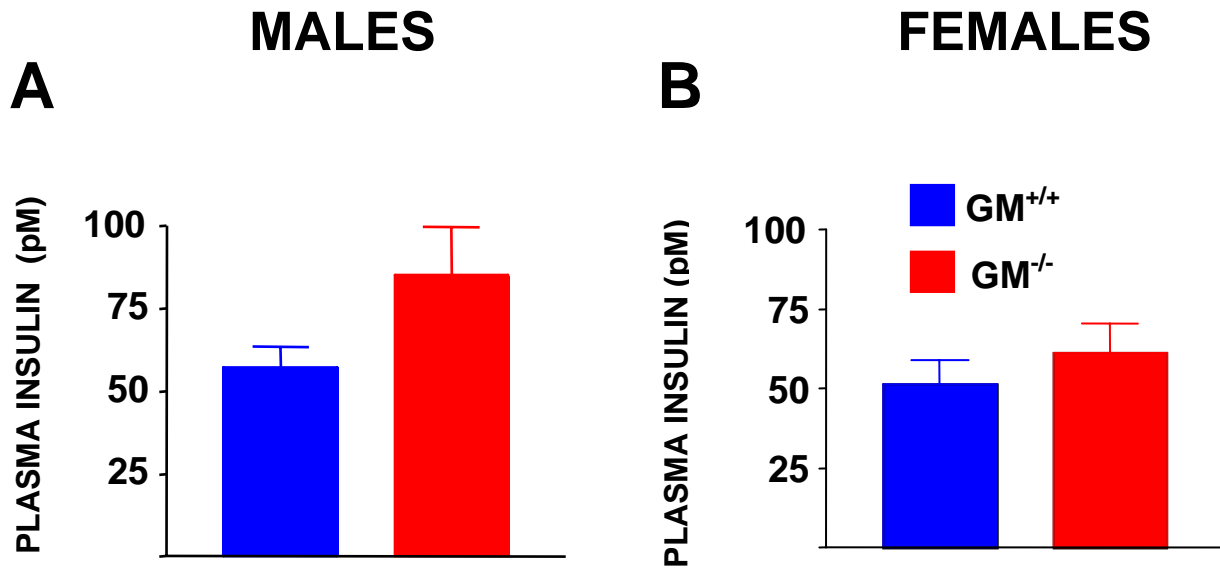

**SUPPLEMENTAL FIGURE 6**

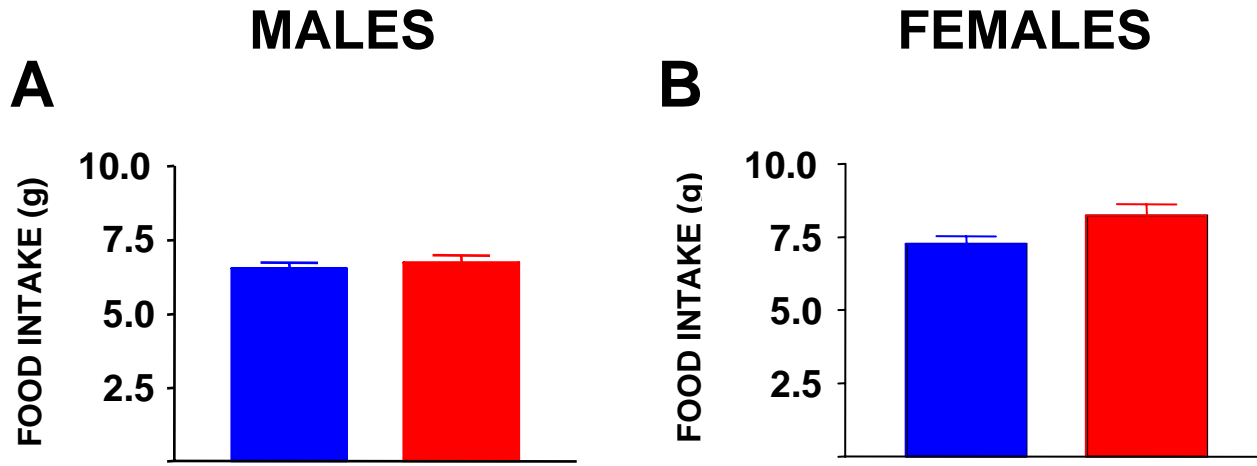

## SUPPLEMENTAL FIGURE 7

## MALES

A

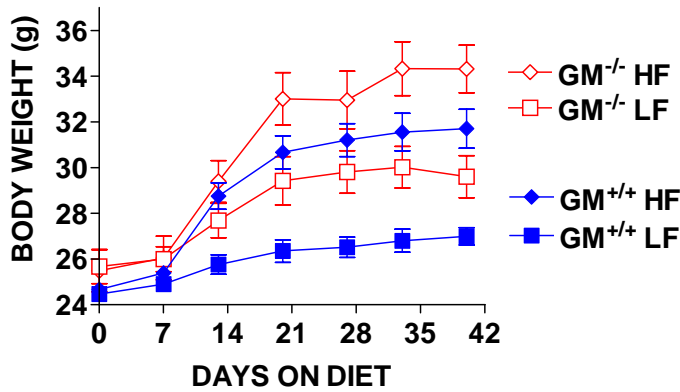

## FEMALES

B

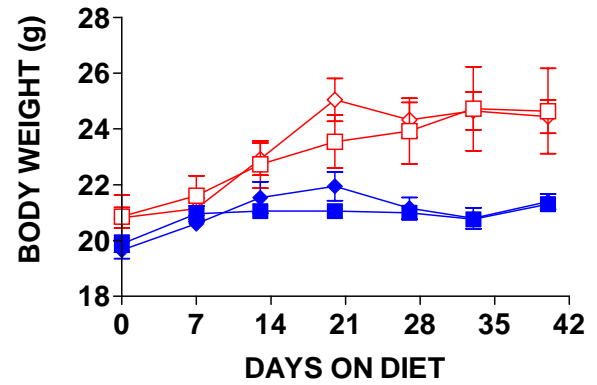

C

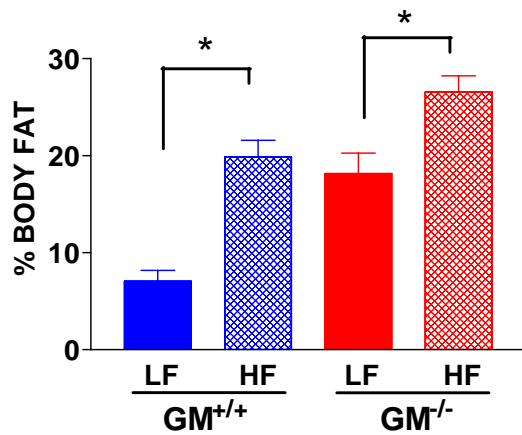

D

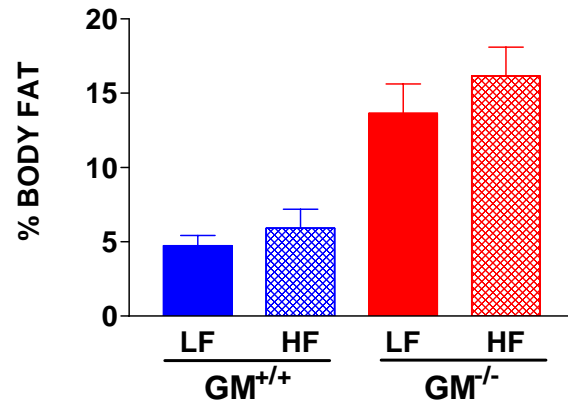

E

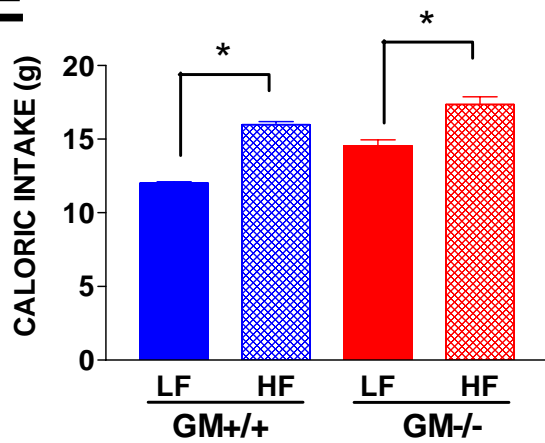

F

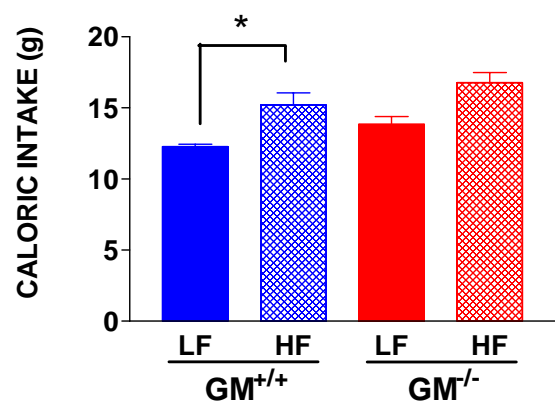

## Figure Legends for Supplemental Figures

### Supplemental Figure 1

GM-CSF injections in rats. **(A)** Rats injected with 0.6  $\mu\text{g}$  i3vt GM-CSF (GM) had a greater decrease in body weight at 24 h post-injection, compared with rats receiving i3vt vehicle (veh) injection. **(B)** Body weight loss in rats injected with 0.6, 1.0, or 6.0  $\mu\text{g}$  did not differ significantly at any time point, as shown here at 48 h post-injection. **(C)** Rats receiving 0.6  $\mu\text{g}$  rat GM-CSF had significantly greater change in body weight at 24 h post-injection, compared to vehicle- and human GM-CSF- (hGM) injected rats. Rats receiving 0.6  $\mu\text{g}$  hGM did not differ significantly from vehicle-treated rats. (\* $p < 0.05$ , all groups  $N = 7$  to 9, mean  $\pm$  SEM.)

### Supplemental Figure 2

Food intake and body weight associated with sodium appetite test. Following sodium appetite test, **(A)** food intake in rats receiving i3vt GM-CSF (0.6  $\mu\text{g}$ ) was significantly decreased and **(B)** body weight change was significantly greater, compared to i3vt vehicle-treated or i.p. saline- (sal) or lithium chloride (LiCl)-treated groups. (\* $p < 0.05$ , all groups  $N = 7$  to 9, mean  $\pm$  SEM.)

### Supplemental Figure 3

GM-CSF mRNA expression. **(A)** Peripheral GM-CSF expression in ad lib-fed and 48-h fasted rats. Semi-quantitative RT-PCR for GM-CSF detected transcripts in lung, adipose, and liver RNA from fasted and fed rats. GM-CSF was normalized to housekeeping gene



L32, and mean value of GM-CSF in fed lung was set at 1. Expression in fasted lung and other tissues is expressed relative to that of fed lung. GM-CSF RNA accumulation did not differ significantly between groups. (n = 5 to 8) **(B)** GM-CSF expression was measured by Q-PCR in hypothalamus from fed, 48 h-fasted, or fed LPS-treated rats. Compared to expression in fed animals, GM-CSF expression was not significantly decreased in fasted animals and was increased in animals injected with LPS

#### **Supplemental Figure 4**

Characterization of age- and sex-matched GM<sup>-/-</sup> and GM<sup>+/+</sup> mice. Body lengths of **(A)** male and **(B)** female GM<sup>-/-</sup> and GM<sup>+/+</sup> mice differed slightly at 12 weeks, but were similar at all other time points. (\*p<0.05, n = 7-9, mean ± SEM). **(C)** The lean mass as a percent of total body weight was similar in all mice. **(D)** Visceral fat was visibly increased in female GM<sup>-/-</sup> mice, compared to GM<sup>+/+</sup> control mice. **(E)** Weights of parametrial (PE), retroperitoneal (RE), and mesenteric (ME) fat pads were increased in female GM<sup>-/-</sup> mice compared to GM<sup>+/+</sup> control mice. (\*p<0.05, n = 4, mean ±SEM) **(F)** NPY, AgRP, POMC, insulin receptor mRNA expression was similar and LepR expression was increased in GM<sup>-/-</sup> and GM<sup>+/+</sup> hypothalamus. (\*p<0.05, n=8, mean ±SEM)

#### **Supplemental Figure 5**

Plasma insulin levels. Plasma insulin levels in **(A)** male and **(B)** female GM<sup>-/-</sup> mice did not differ significantly from those in sex-matched GM<sup>+/+</sup> controls. (n = 7 to 11)

#### **Supplemental Figure 6**

Post-fasting food intake and high- or low-fat diet intake. Following a 24 h fast, food intake during 24 h re-feeding period did not differ between  $GM^{-/-}$  and  $GM^{+/+}$  male (A) and female (B) mice. (n = 7 to 11)

### Supplemental Figure 7

Effects of high and low fat diets. Male and female  $GM^{-/-}$  and  $GM^{+/+}$  mice were placed on low or high fat diets for a period of 5 weeks. Body weights in (A) male  $GM^{-/-}$  mice were higher than in sex-matched  $GM^{+/+}$  mice on either diet, while fat composition of the diets had little effect in (B) female  $GM^{-/-}$  mice. (C) Body fat was increased proportionally in  $GM^{-/-}$  and  $GM^{+/+}$  males, while (D)  $GM^{-/-}$  females had increased body fat independent of dietary fat content.  $GM^{+/+}$  females on low and high fat diets had similar amounts of body fat. (E) Caloric intake was significantly increased in  $GM^{+/+}$  and  $GM^{-/-}$  male mice consuming a high fat diet, compared to a low fat diet. (F)  $GM^{+/+}$  female mice consumed more calories on a high fat diet but  $GM^{+/+}$ , but caloric intake of  $GM^{-/-}$  female groups did not differ significantly on low or high fat diets. (\*p<0.05, n = 8 to 10, mean  $\pm$ SEM)
